# Supplementary material for: Comparative analysis of the use of mobile applications versus other reporting channels for adverse events reporting during COVID-19 vaccine deployment in Ghana
Source: Research Square preprint supplement (doi:10.21203/rs.3.rs-7234872/v1), 2025-09-29
Supplement: Supplementary file 1 [file 9f1fd9a60dd59c6535ea2385.pdf]

## **Comparative analysis of the use of mobile application versus other reporting channels for Adverse Events Reporting during COVID-19 vaccine deployment in Ghana**

We are conducting a study on healthcare professionals specifically, vaccinators, field supervisors and physicians on “Comparative analysis of the use of the mobile application versus other reporting tools for adverse events reporting during COVID-19 vaccine deployment in Ghana.

This information will help us assess the level of awareness of healthcare professionals on the use of the Med Safety App for reporting adverse events following immunization (AEFIs).

In view of this, I would like to ask you some questions to assess your knowledge on the use on the use of Med Safety App for reporting AEFIs during the COVID-19 vaccine deployment in Ghana.

Your participation in this study is voluntary and I envisage your active participation to contribute to the success of this study.

This questionnaire will be self-administered, and it will take an average of 15 minutes to complete. Whatever information you provide will be kept strictly confidential and will not be shown to other persons.

Thank you for taking the time to respond to this questionnaire

---

Interviewee code: .....

Date of Interview: .....

Interviewer code: .....

District: .....

### **Section 1. Personal information**

1. Gender: Male ☐ Female ☐

2. Age.....

3. Place of residence:.....

4. Level of training as a healthcare worker

Degree ☐ Diploma ☐ Certificate ☐

5. What type of healthcare worker are you?

Community health nurse ☐ Disease control officer ☐ Physician ☐

Public health nurse ☐

### **Experience level as a healthcare worker**

6. How long have you worked or practiced as a healthcare worker?

.....years

7. If you are a community health nurses/ public health nurses or disease control officer, how long have you been involved in vaccination programs?

.....years

### **Section 2. General knowledge on AEFI and AEFI reporting in Ghana**

8. Do you know what an adverse events following immunization (AEFI) of a vaccine is?

Yes ☐ No ☐

9. Are you aware you need to report **all** AEFIs (side effects of vaccines)?

Yes ☐ No ☐

10. Who do you think is responsible for reporting AEFI?

Vaccinator ☐ Physician ☐ Patient/ caregiver ☐ Disease control ☐  
officer ☐ any health worker ☐ Vaccinee/ consumer ☐

11. When are you required to report an AEFI when they occur?

a. immediately ☐ b. within 24hrs ☐ c. any other time ☐

12. Have you encountered an AEFI from any vaccine apart from COVID-19 vaccines?

Yes ☐ No ☐

13. Are you aware of the tools for reporting AEFIs in Ghana?

Yes ☐ No ☐

14. Have you reported an AEFI from a vaccine apart from COVID-19 vaccines before?

Yes ☐ No ☐

15. If "Yes", what did you use to report? Select as many as you have used before

Paper forms ☐

Telephone calls ☐

FDA's website ☐

Others (kindly state any other means) .....

16. If "No", Why did you not report?

It was a common reaction ☐ I am not aware of the reporting procedures ☐

I did not know how what tool to use ☐ I did not know who to report to ☐

I did not know it was an AEFI ☐

17. Have you received any training on AEFI and how it can be reported in Ghana?

Yes ☐ No ☐

**Section 2. Knowledge on the use of the Med Safety App for reporting AEFI**

18. Have you encountered an AEFI from any of the COVID-19 vaccines?

Yes ☐ No ☐

If “Yes”, can you mention some of the reactions?

.....

19. Have you heard of the of the Med Safety App? Yes ☐ No ☐

20. When did you hear about the use of the Med Safety App?

I knew about the Med Safety App Before the COVID-19 vaccination started in Ghana ☐

I heard about the Med Safety App prior to the deployment of the COVID-19 vaccines in Ghana ☐

I got to know about the Med Safety App only during the vaccine deployment ☐

21. What is the use of the Med Safety App?

a. For reporting AEFIs for COVID-19 vaccines ☐

b. For receiving safety alerts and information on the COVID-19 vaccines ☐

c. For reporting adverse drug reactions from medicines ☐

22. Have you reported an adverse event following immunization (AEFI) from any of the COVID-19 vaccines using the Med Safety App?

Yes ☐ No ☐

23. If “No”, then which of the following did you use to report the AEFI from COVID-19 vaccine?

Paper reporting form at a health facility (hospital, clinic etc) ☐

Telephone call ☐

Online via FDA website ☐

FDA WhatsApp line ☐

None ☐

if none kindly state how you reported the AEFI.....

.....

24. Was it easy to use the Med Safety App AEFI?

Very easy ☐      Easy ☐      Not easy ☐

25. Apart from using the Med Safety App to report AEFI, are you aware of the other features of the App? Yes ☐      No ☐

26. What will prevent you from using the Med Safety App for reporting AEFI?

Poor internet connectivity ☐      Cost of data/ internet charges ☐

It may occupy a big memory size on my smartphone ☐

27. Will you recommend the use of the Med Safety for reporting AEFIs in future pandemic situations like COVID-19

Yes ☐      No ☐      May be ☐

### **General information**

28. Have you received any training on Med Safety App before?

Yes ☐      No ☐

29. If "Yes", where?

During training (at school) ☐      At a workshop ☐      FDA PV Sensitization ☐  
Annual General meetings ☐

30. Overall, which reporting tool below will you prefer to use in reporting AEFIs?

Paper reporting form at a health facility (hospital, clinic etc) ☐

Telephone call ☐

Online via FDA website ☐

FDA WhatsApp line ☐

The Med Safety App ☐

None ☐

if none of the above, kindly state how you reported the

AEFI.....

**What is your general impression about the use Med Safety App?**

.....

.....

.....

**Thank you**
